# Supplementary material for: Encapsulation-Stabilized, Europium Containing Nanoparticle as a Probe for Time-Resolved luminescence Detection of Cardiac Troponin I
Source: PubMed Central journal article supplement (PMC5746771; doi:10.3390/bios7040048), 2017-10-18
Supplement: biosensors-07-00048-s001.pdf [file biosensors-07-00048-s001.pdf]

# Supplementary Material: Encapsulation-Stabilized, Europium Containing Nanoparticle as a Probe for Time-Resolved luminescence Detection of Cardiac Troponin I

Ka Ram Kim <sup>1,†</sup>, Yong Duk Han <sup>1,†</sup>, Hyeong Jin Chun <sup>1</sup>, Kyung Won Lee <sup>1</sup>, Dong-Ki Hong <sup>2</sup>, Kook-Nyung Lee <sup>2</sup> and Hyun C. Yoon <sup>1,\*</sup>

<sup>1</sup> Department of Molecular Science & Technology, Ajou University, Suwon 16499, Korea; kkr4649@ajou.ac.kr (K.R.K.); Han.Yong@mayo.edu (Y.D.H.); moogoosla@ajou.ac.kr (H.J.C.); ursus780@ajou.ac.kr (K.W.L.)

<sup>2</sup> Korea Electronics Technology Institute, Seongnam 13509, Korea; hdk0816@gmail.com (D.-K.H.); plummy@keti.re.kr (K.-N.L.)

\* Correspondence: hcyoon@ajou.ac.kr; Tel.: +82-31-219-2512

† These authors contributed equally.

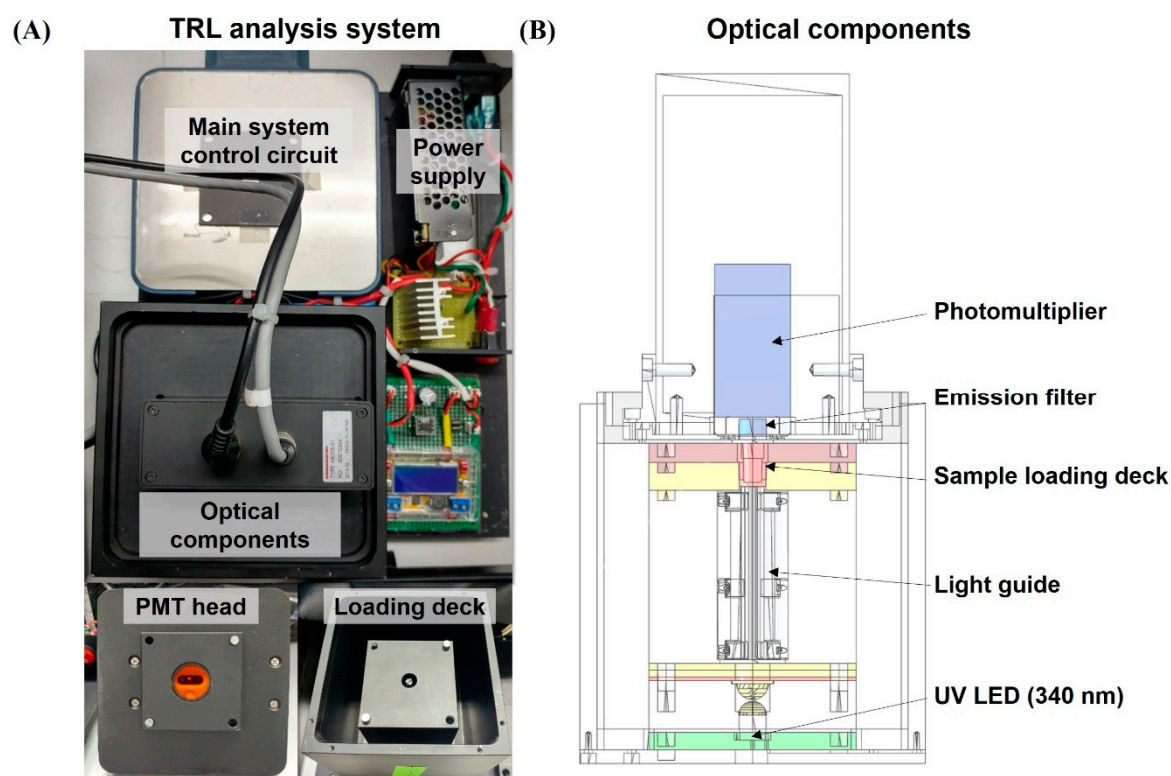

**Figure S1.** Constructed TRL analyzer (A) Overall instrument layout of TRL analysis system. (B) Schematic illustration of the structure of the developed TRL analyzer.
